# Supplementary material for: Does the Dirac cone of germanene exist on metal substrates?
Source: Royal Society of Chemistry journal article supplement (doi:10.1039/c6cp03040h), 2016-01-01
Supplement: c6cp03040h1.pdf [file c6cp03040h1.pdf]

## Supporting Information

### Does the Dirac Cone of Germanene Exist on Metal Substrates?

Yangyang Wang<sup>1,3†</sup>, Jingzhen Li<sup>1,†</sup>, Junhua Xiong<sup>6</sup>, Yuanyuan Pan<sup>1</sup>, Meng Ye<sup>1</sup>, Ying Guo<sup>4</sup>,  
Han Zhang<sup>1</sup>, Ruge Quhe<sup>5,\*</sup>, Jing Lu<sup>1,2,\*</sup>

<sup>1</sup>State Key Laboratory of Mesoscopic Physics and Department of Physics,

Peking University, Beijing 100871, P. R. China

<sup>2</sup>Collaborative Innovation Center of Quantum Matter, Beijing 100871, P. R. China

<sup>3</sup>Nanophotonics and Optoelectronics Research Center, Qian Xuesen Laboratory of Space

<sup>4</sup>Technology, China Academy of Space Technology, Beijing 100094, P. R. China

School of Physics and Telecommunication Engineering, Shaanxi University of Technology,

Hanzhong 723001, P. R. China

<sup>5</sup>State Key Laboratory of Information Photonics and Optical Communications, Beijing  
University of Posts and Telecommunications & School of Science, Beijing 100876, China

<sup>6</sup>Department of Electric Power, North China University of Water Resources and Electric  
Power, Zhengzhou, P. R. China 450045

<sup>†</sup>These authors contributed equally to this work.

\*Corresponding author: jinglu@pku.edu.cn, quheruge@bupt.edu.cn

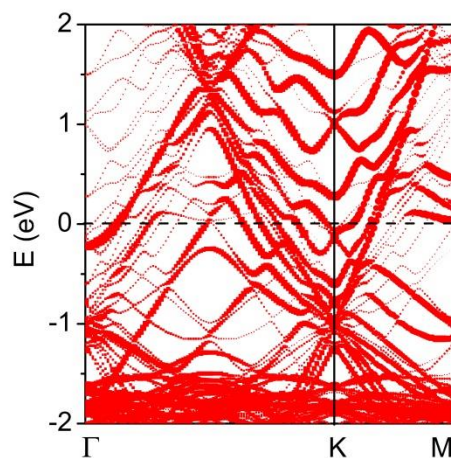

**Figure S1.** Band structure of  $(\sqrt{3}\times\sqrt{3})$  germanene/ $(\sqrt{7}\times\sqrt{7})$  Au(111) unfolded to Brillouin zone of the primitive germanene cell. The radii of dots represent the weight of unfolding. The Fermi level is set to zero.
